# Supplementary material
Source: Springer Nature journal article supplement (https://www.springermedizin.de/resource/supplementary/12891_2007_405_MOESM5_ESM.pdf/9510974)
Supplement: MOESM5 [file 9510974]

Patient No 1

Patient No 2

Patient No 3

Patient No 4

Patient No 5

Patient No 6

Line

1 2 3 4 5 6 7 8

1 2 3 4 5 6 7 8

1 2 3 4 5 6 7 8

1 2 3 4 5 6 7 8

1 2 3 4 5 6 7 8

1 2 3 4 5 6 7 8

BMP-2

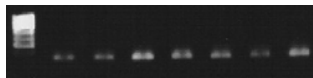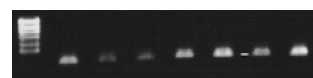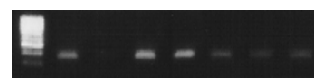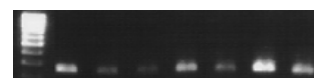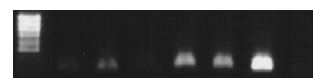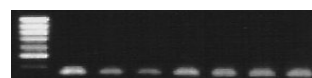

BMP-4

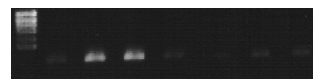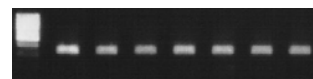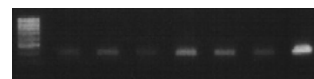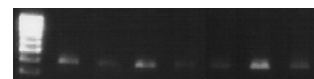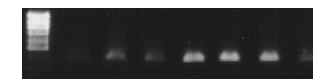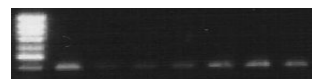

$\beta$ -actin

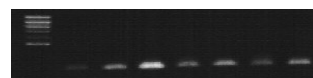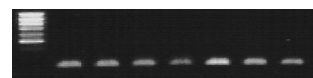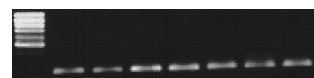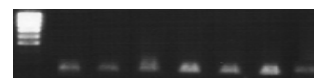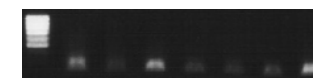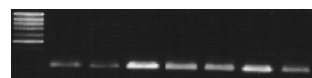

Lines: 1 – DNA marker; 2 – Bone 1; 3 – Bone 2; 4 – Bone 3; 5 – Bone 4; 6 – Bone 5; 7 – Bone 6; 8 – Bone 7
